# Supplementary material for: MicroRNA Expression in Formalin-fixed Paraffin-embedded Cancer Tissue: Identifying Reference MicroRNAs and Variability
Source: Springer Nature journal article supplement (doi:10.1186/s12885-015-2030-2), 2015-12-01
Supplement: MOESM1 [file 9745846]

1 **SUPPLEMENTARY INFORMATION**

2

| <b>Supplementary Table S1. Methodological samples</b> |                     |                   |                           |                             |
|-------------------------------------------------------|---------------------|-------------------|---------------------------|-----------------------------|
| <b>Project ID</b>                                     | <b>Tumor number</b> | <b>Block type</b> | <b>Description</b>        | <b>Excluded<sup>a</sup></b> |
| 2                                                     | 1                   | FFPE              | First cut                 |                             |
| 92                                                    | 1                   | FFPE              | Second cut                |                             |
| 57                                                    | 2                   | FFPE              | First cut                 |                             |
| 97                                                    | 2                   | FFPE              | Second cut                |                             |
| 166                                                   | 3                   | FFPE              | First cut                 |                             |
| 245                                                   | 3                   | FFPE              | Second cut                |                             |
| 120                                                   | 4                   | FROZEN            | Fresh frozen tumor block  |                             |
| 121                                                   | 4                   | FFPE1             | 2-day fixation first cut  |                             |
| 122                                                   | 4                   | FFPE1             | 2-day fixation second cut |                             |
| 123                                                   | 4                   | FFPE1             | 2-day fixation third cut  |                             |
| 124                                                   | 4                   | FFPE1             | 2-day fixation fourth cut | x                           |
| 125                                                   | 4                   | FFPE1             | 2-day fixation fifth cut  |                             |
| 126                                                   | 4                   | FFPE2             | 3-day fixation            |                             |
| 127                                                   | 4                   | FFPE3             | 6-day fixation            | x                           |
| 136                                                   | 5                   | FROZEN            | Fresh frozen tumor block  |                             |
| 137                                                   | 5                   | FFPE1             | 2-day fixation            |                             |
| 138                                                   | 5                   | FFPE2             | 3-day fixation            |                             |
| 139                                                   | 5                   | FFPE3             | 6-day fixation            |                             |
| 6                                                     | 6                   | FROZEN            | Fresh frozen tumor block  |                             |
| 7                                                     | 6                   | FFPE1             | 2-day fixation            |                             |
| 7r1                                                   | 6                   | FFPE1             | 2-day fixation first run  |                             |
| 7r2                                                   | 6                   | FFPE1             | 2-day fixation second run |                             |
| 7r3                                                   | 6                   | FFPE1             | 2-day fixation third run  |                             |
| 7r4                                                   | 6                   | FFPE1             | 2-day fixation fourth run |                             |
| 7r5                                                   | 6                   | FFPE1             | 2-day fixation fifth run  |                             |
| 8                                                     | 6                   | FFPE2             | 3-day fixation            |                             |
| 9                                                     | 6                   | FFPE3             | 6-day fixation            |                             |
| 10                                                    | 7                   | FROZEN            | Fresh frozen tumor block  |                             |
| 11                                                    | 7                   | FFPE1             | 2-day fixation            |                             |
| 12                                                    | 7                   | FFPE2             | 3-day fixation            |                             |
| 13                                                    | 7                   | FFPE3             | 6-day fixation            |                             |
| 256                                                   | 8                   | FROZEN            | Fresh frozen tumor block  |                             |
| 257                                                   | 8                   | FFPE1             | 2-day fixation            | x                           |
| 258                                                   | 8                   | FFPE2             | 3-day fixation            |                             |
| 259                                                   | 9                   | FROZEN            | Fresh frozen tumor block  | (x) <sup>b</sup>            |
| 260                                                   | 9                   | FFPE1             | 2-day fixation            | x                           |
| 261                                                   | 9                   | FFPE2             | 6-day fixation            | x                           |

<sup>a</sup> Excluded based on 260/280 nm or 260/230 nm ratio.

<sup>b</sup> Project ID 259 was not used because no formalin-fixed sample from that tumor was usable.

3

4

5

**Supplementary Table S2.** Reference miRNAs – colorectal cancer

| MiRNA name <sup>a</sup> | Correlation to global mean C <sub>q</sub> |                   | Correlation to OS <sup>c</sup> |         | Stability <sup>d</sup> |
|-------------------------|-------------------------------------------|-------------------|--------------------------------|---------|------------------------|
|                         | <i>r<sub>s</sub></i> <sup>b</sup>         | HR/C <sub>q</sub> | <i>P</i>                       | M score |                        |
| Global mean             | –                                         | 0.933             | 0.215                          | –       |                        |
| hsa-miR-103a-3p         | 0.891                                     | 0.950             | 0.220                          | 1.044   |                        |
| hsa-miR-152-3p          | 0.914                                     | 0.953             | 0.257                          | 1.074   |                        |
| hsa-miR-132-3p          | 0.880                                     | 0.961             | 0.317                          | 1.094   |                        |
| hsa-miR-27a-3p          | 0.884                                     | 0.940             | 0.129                          | 1.099   |                        |
| hsa-miR-140-5p          | 0.910                                     | 0.924             | 0.037                          | 1.107   |                        |
| hsa-miR-30b-5p          | 0.932                                     | 0.966             | 0.282                          | 1.118   |                        |
| hsa-miR-339-5p          | 0.887                                     | 0.952             | 0.277                          | 1.122   |                        |
| hsa-miR-331-3p          | 0.906                                     | 0.964             | 0.397                          | 1.131   |                        |
| hsa-miR-374a-5p         | 0.893                                     | 0.964             | 0.321                          | 1.142   |                        |
| hsa-miR-652-3p          | 0.886                                     | 0.954             | 0.290                          | 1.152   |                        |
| hsa-miR-335-5p          | 0.882                                     | 0.933             | 0.091                          | 1.171   |                        |
| hsa-miR-185-5p          | 0.902                                     | 0.942             | 0.241                          | 1.179   |                        |
| hsa-miR-30c-5p          | 0.930                                     | 0.961             | 0.217                          | 1.186   |                        |
| hsa-miR-151a-5p         | 0.901                                     | 0.974             | 0.519                          | 1.213   |                        |
| hsa-miR-106b-5p         | 0.886                                     | 0.964             | 0.332                          | 1.215   |                        |
| hsa-miR-199a-3p         | 0.904                                     | 0.970             | 0.374                          | 1.215   |                        |
| hsa-miR-28-5p           | 0.892                                     | 0.960             | 0.251                          | 1.226   |                        |
| hsa-miR-425-5p          | 0.901                                     | 1.002             | 0.956                          | 1.246   |                        |
| hsa-miR-26a-5p          | 0.912                                     | 0.967             | 0.289                          | 1.293   |                        |
| hsa-miR-24-3p           | 0.892                                     | 0.982             | 0.613                          | 1.681   |                        |

<sup>a</sup> MiRBase version 21 ([www.mirbase.org](http://www.mirbase.org), accessed July 25 2014).

<sup>b</sup> Spearman's rank correlation coefficient.

<sup>c</sup> Correlation to OS duration tested using Cox proportional hazards model.

<sup>d</sup> Stability score calculated according to the method described in Vandesompele et al. [1]

Abbreviations: OS, overall survival; C<sub>q</sub>, quantification cycle; HR/C<sub>q</sub>, hazard ratio per 40-C<sub>q</sub> increase.

**Supplementary Table S3.** Reference miRNAs – pancreatic cancer

| MiRNA name <sup>a</sup> | Correlation to global mean C <sub>q</sub> | Correlation to OS <sup>c</sup> |          | Stability <sup>d</sup> |
|-------------------------|-------------------------------------------|--------------------------------|----------|------------------------|
|                         | <i>r<sub>s</sub></i> <sup>b</sup>         | HR/C <sub>q</sub>              | <i>P</i> | M score                |
| Global mean             | –                                         | 1.101                          | 0.249    | –                      |
| hsa-miR-103a-3p         | 0.943                                     | 1.058                          | 0.309    | 0.670                  |
| hsa-miR-374b-5p         | 0.942                                     | 1.079                          | 0.201    | 0.680                  |
| hsa-miR-361-5p          | 0.918                                     | 1.068                          | 0.288    | 0.749                  |
| hsa-miR-374a-5p         | 0.911                                     | 1.058                          | 0.356    | 0.754                  |
| hsa-let-7g-5p           | 0.917                                     | 1.072                          | 0.197    | 0.756                  |
| hsa-miR-28-5p           | 0.924                                     | 1.082                          | 0.198    | 0.761                  |
| hsa-miR-29a-3p          | 0.913                                     | 1.093                          | 0.245    | 0.783                  |
| hsa-miR-301a-3p         | 0.921                                     | 1.037                          | 0.480    | 0.786                  |
| hsa-miR-340-5p          | 0.950                                     | 1.103                          | 0.148    | 0.791                  |
| hsa-miR-27a-3p          | 0.923                                     | 1.146                          | 0.043    | 0.792                  |
| hsa-miR-106b-5p         | 0.885                                     | 1.039                          | 0.554    | 0.810                  |
| hsa-miR-152-3p          | 0.914                                     | 1.088                          | 0.169    | 0.821                  |
| hsa-miR-26b-5p          | 0.915                                     | 1.050                          | 0.262    | 0.829                  |
| hsa-miR-660-5p          | 0.902                                     | 1.013                          | 0.843    | 0.837                  |
| hsa-miR-26a-5p          | 0.909                                     | 1.064                          | 0.167    | 0.843                  |
| hsa-miR-24-3p           | 0.895                                     | 1.088                          | 0.087    | 0.850                  |
| hsa-miR-130a-3p         | 0.884                                     | 1.074                          | 0.117    | 0.911                  |
| hsa-miR-23b-3p          | 0.885                                     | 1.034                          | 0.524    | 0.922                  |
| hsa-let-7f-5p           | 0.887                                     | 1.082                          | 0.084    | 0.948                  |
| hsa-miR-199a-3p         | 0.897                                     | 1.082                          | 0.064    | 0.991                  |

<sup>a</sup> MiRBase version 21 (www.mirbase.org, accessed July 25 2014).

<sup>b</sup> Spearman's rank correlation coefficient.

<sup>c</sup> Correlation to OS duration tested using Cox proportional hazards model.

<sup>d</sup> Stability score calculated according to the method described in Vandesompele et al. [1]

Abbreviations: OS, overall survival; C<sub>q</sub>, quantification cycle; HR/C<sub>q</sub>, hazard ratio per 40-C<sub>q</sub> increase.

7

8

9

10

| <b>Supplementary Table S4. Reference miRNAs – normal pancreas (n=20)</b> |                                                 |                              |                                              |
|--------------------------------------------------------------------------|-------------------------------------------------|------------------------------|----------------------------------------------|
| <b>MiRNA name<sup>a</sup></b>                                            | <b>Correlation to global mean C<sub>q</sub></b> | <b>Stability<sup>c</sup></b> | <b>Also in pancreatic cancer top 20 list</b> |
|                                                                          | <b>r<sub>s</sub><sup>b</sup></b>                | <b>M score</b>               |                                              |
| hsa-miR-374a-5p                                                          | 0.880                                           | 0.284                        | <b>x</b>                                     |
| hsa-miR-660-5p                                                           | 0.886                                           | 0.308                        | <b>x</b>                                     |
| hsa-miR-152-3p                                                           | 0.895                                           | 0.322                        | <b>x</b>                                     |
| hsa-miR-361-5p                                                           | 0.856                                           | 0.328                        | <b>x</b>                                     |
| hsa-miR-29b-3p                                                           | 0.848                                           | 0.329                        |                                              |
| hsa-miR-101-3p                                                           | 0.871                                           | 0.333                        |                                              |
| hsa-miR-93-5p                                                            | 0.871                                           | 0.333                        |                                              |
| hsa-miR-331-3p                                                           | 0.874                                           | 0.333                        |                                              |
| hsa-miR-16-5p                                                            | 0.847                                           | 0.336                        |                                              |
| hsa-miR-125b                                                             | 0.886                                           | 0.338                        |                                              |
| hsa-miR-27a-3p                                                           | 0.908                                           | 0.338                        | <b>x</b>                                     |
| hsa-miR-340-5p                                                           | 0.853                                           | 0.339                        | <b>x</b>                                     |
| hsa-miR-19a-3p                                                           | 0.877                                           | 0.340                        |                                              |
| hsa-miR-103a-3p                                                          | 0.871                                           | 0.340                        | <b>x</b>                                     |
| hsa-miR-20b-5p                                                           | 0.857                                           | 0.341                        |                                              |
| hsa-miR-126-3p                                                           | 0.877                                           | 0.345                        |                                              |
| hsa-miR-301a-3p                                                          | 0.854                                           | 0.358                        | <b>x</b>                                     |
| hsa-miR-221-3p                                                           | 0.901                                           | 0.359                        |                                              |
| hsa-miR-454-3p                                                           | 0.851                                           | 0.360                        |                                              |
| hsa-miR-15a-5p                                                           | 0.884                                           | 0.384                        |                                              |

<sup>a</sup> MiRBase version 21 (www.mirbase.org, accessed September 23 2014).

<sup>b</sup> Spearman's rank correlation coefficient.

<sup>c</sup> Stability score calculated according to the method described in Vandesompele et al. [1]

Abbreviations: C<sub>q</sub>, quantification cycle.

| <b>Supplementary Table S5. Reference miRNAs – chronic pancreatitis (n=20)</b> |                                                                                      |                                          |                                              |
|-------------------------------------------------------------------------------|--------------------------------------------------------------------------------------|------------------------------------------|----------------------------------------------|
| <b>MiRNA name<sup>a</sup></b>                                                 | <b>Correlation to global mean C<sub>q</sub><br/><i>r<sub>s</sub><sup>b</sup></i></b> | <b>Stability<sup>c</sup><br/>M score</b> | <b>Also in pancreatic cancer top 20 list</b> |
| hsa-miR-191-5p                                                                | 0.976                                                                                | 0.421                                    |                                              |
| hsa-miR-374a-5p                                                               | 0.964                                                                                | 0.437                                    | <b>x</b>                                     |
| hsa-miR-106b-5p                                                               | 0.956                                                                                | 0.450                                    | <b>x</b>                                     |
| hsa-miR-301a-3p                                                               | 0.979                                                                                | 0.455                                    | <b>x</b>                                     |
| hsa-miR-340-5p                                                                | 0.953                                                                                | 0.464                                    | <b>x</b>                                     |
| hsa-miR-454-3p                                                                | 0.983                                                                                | 0.469                                    |                                              |
| hsa-miR-99b-5p                                                                | 0.977                                                                                | 0.477                                    |                                              |
| hsa-miR-744-5p                                                                | 0.961                                                                                | 0.480                                    |                                              |
| hsa-miR-361-5p                                                                | 0.979                                                                                | 0.481                                    | <b>x</b>                                     |
| hsa-miR-24-3p                                                                 | 0.962                                                                                | 0.487                                    | <b>x</b>                                     |
| hsa-miR-101-3p                                                                | 0.986                                                                                | 0.499                                    |                                              |
| hsa-miR-374b-5p                                                               | 0.968                                                                                | 0.540                                    | <b>x</b>                                     |
| hsa-miR-103a-3p                                                               | 0.967                                                                                | 0.541                                    | <b>x</b>                                     |
| hsa-miR-126-3p                                                                | 0.965                                                                                | 0.558                                    |                                              |
| hsa-miR-128-3p                                                                | 0.962                                                                                | 0.563                                    |                                              |
| hsa-miR-29a-3p                                                                | 0.956                                                                                | 0.571                                    | <b>x</b>                                     |
| hsa-miR-193a-3p                                                               | 0.946                                                                                | 0.576                                    |                                              |
| hsa-miR-660-5p                                                                | 0.956                                                                                | 0.595                                    | <b>x</b>                                     |
| hsa-miR-130a-3p                                                               | 0.946                                                                                | 0.718                                    | <b>x</b>                                     |
| hsa-miR-410-3p                                                                | 0.971                                                                                | 0.767                                    |                                              |

<sup>a</sup> MiRBase version 21 (www.mirbase.org, accessed September 23 2014).

<sup>b</sup> Spearman's rank correlation coefficient.

<sup>c</sup> Stability score calculated according to the method described in Vandesompele et al. [1]  
Abbreviations: C<sub>q</sub>, quantification cycle.

**Supplementary Table S6.** Association between expression of selected miRNAs and overall survival using different normalizations

| <b>Pancreatic cancer</b> |                                         |                       |               |          |
|--------------------------|-----------------------------------------|-----------------------|---------------|----------|
| <b>miRNA<sup>a</sup></b> | <b>Normalization method<sup>b</sup></b> | <b>HR<sup>c</sup></b> | <b>95% CI</b> | <b>p</b> |
| hsa-miR-212-3p           | Global mean                             | 1.26                  | 1.06–1.49     | <0.01    |
| hsa-miR-212-3p           | Mean of reference miRNAs                | 1.16                  | 0.99–1.37     | 0.07     |
| hsa-miR-675-5p           | Global mean                             | 1.24                  | 1.00–1.55     | 0.05     |
| hsa-miR-675-5p           | Mean of reference miRNAs                | 1.17                  | 0.96–1.43     | 0.13     |
| hsa-miR-187-3p           | Global mean                             | 0.75                  | 0.59–0.95     | 0.02     |
| hsa-miR-187-3p           | Mean of reference miRNAs                | 0.74                  | 0.59–0.94     | 0.01     |
| <b>Colorectal cancer</b> |                                         |                       |               |          |
| <b>miRNA<sup>a</sup></b> | <b>Normalization method<sup>b</sup></b> | <b>HR<sup>c</sup></b> | <b>95% CI</b> | <b>p</b> |
| hsa-miR-592              | Global mean                             | 0.86                  | 0.71–1.06     | 0.16     |
| hsa-miR-592              | Mean of reference miRNAs                | 0.91                  | 0.75–1.10     | 0.32     |
| hsa-miR-29b-3p           | Global mean                             | 0.83                  | 0.68–1.00     | 0.05     |
| hsa-miR-29b-3p           | Mean of reference miRNAs                | 0.88                  | 0.70–1.09     | 0.23     |
| hsa-miR-196b-5p          | Global mean                             | 0.96                  | 0.82–1.14     | 0.66     |
| hsa-miR-196b-5p          | Mean of reference miRNAs                | 1.04                  | 0.85–1.26     | 0.72     |

The miRNAs were selected from the list of candidate prognostic miRNAs in two previously published papers [2, 3]. Since we used all data points without any adjustments for these analyses, results will differ from the ones reported in the previous papers.

<sup>a</sup> MiRBase version 21 ([www.mirbase.org](http://www.mirbase.org), accessed September 23 2014).

<sup>b</sup> The identified optimal number of reference miRNAs were used for each cancer type (from Table 1 and 2)

<sup>c</sup> Overall survival HR per inter-quartile range increase in 40-C<sub>q</sub>, calculated using Cox proportional hazard model.

Abbreviations: HR, hazard ratio; CI, confidence interval.

22

| Supplementary Table S7. Variability in miRNA expression measurements (without removal of low expression values) |                 |                                                 |                  |              |       |                                        |                                        |                |
|-----------------------------------------------------------------------------------------------------------------|-----------------|-------------------------------------------------|------------------|--------------|-------|----------------------------------------|----------------------------------------|----------------|
|                                                                                                                 |                 |                                                 |                  |              |       | Variability, SD (C <sub>q</sub> )      |                                        |                |
|                                                                                                                 |                 | Correlation <sup>a</sup> , <i>r<sub>s</sub></i> | Raw data         |              |       | Total variability with normalized data |                                        |                |
|                                                                                                                 | Samples         | median (range)                                  | Individual miRNA | Inter-sample | Total | Global mean                            | Optimal number of refs. ( <i>n</i> =4) | Two best refs. |
| Technical replicates                                                                                            | 5               | 0.975 (0.967–0.979)                             | 0.85             | 0.24         | 0.88  | 0.85                                   | 0.86                                   | 0.87           |
| Biological replicates                                                                                           | 4               | 0.965 (0.95–0.97)                               | 0.95             | 0.18         | 0.97  | 0.96                                   | 1.00                                   | 1.02           |
| Frozen vs. FFPE                                                                                                 | 17 <sup>b</sup> | 0.92 (0.77–0.96)                                | 1.95             | 0.98         | 2.19  | 1.89                                   | 1.95                                   | 1.94           |

<sup>a</sup> For frozen versus FFPE, the correlations were calculated between formalin-fixed- and corresponding frozen samples (12 total correlations).

<sup>b</sup> Sample distribution: 5 frozen, 4 x 2-day fixation, 5 x 3-day fixation, and 3 x 6-day fixation.

Abbreviations: FFPE, formalin-fixed paraffin-embedded; SD, standard deviation; C<sub>q</sub>, quantification cycle; *r<sub>s</sub>*, Spearman's rank correlation coefficient; refs., references.

23

24

| <b>Supplementary Table S8. Reference miRNAs – colorectal cancer (using all measurements)</b> |                                                 |                         |                                      |                |                              |
|----------------------------------------------------------------------------------------------|-------------------------------------------------|-------------------------|--------------------------------------|----------------|------------------------------|
| <b>MiRNA name<sup>a</sup></b>                                                                | <b>Correlation to global mean C<sub>q</sub></b> |                         | <b>Correlation to OS<sup>c</sup></b> |                | <b>Stability<sup>d</sup></b> |
|                                                                                              | <i>r<sub>s</sub><sup>b</sup></i>                | <b>HR/C<sub>q</sub></b> | <i>P</i>                             | <b>M score</b> |                              |
| Global mean                                                                                  | –                                               | 0.904                   | 0.237                                | –              |                              |
| hsa-miR-335-5p                                                                               | 0.908                                           | 0.963                   | 0.254                                | 1.461          |                              |
| hsa-miR-152-3p                                                                               | 0.888                                           | 0.984                   | 0.727                                | 1.467          |                              |
| hsa-miR-103a-3p                                                                              | 0.880                                           | 0.964                   | 0.377                                | 1.477          |                              |
| hsa-miR-30b-5p                                                                               | 0.899                                           | 0.977                   | 0.490                                | 1.495          |                              |
| hsa-miR-15b-5p                                                                               | 0.873                                           | 1.023                   | 0.356                                | 1.530          |                              |
| hsa-miR-425-5p                                                                               | 0.903                                           | 0.977                   | 0.603                                | 1.534          |                              |
| hsa-miR-652-3p                                                                               | 0.889                                           | 0.967                   | 0.458                                | 1.545          |                              |
| hsa-miR-376a-3p                                                                              | 0.881                                           | 0.986                   | 0.786                                | 1.552          |                              |
| hsa-miR-132-3p                                                                               | 0.874                                           | 0.988                   | 0.750                                | 1.553          |                              |
| hsa-miR-151a-5p                                                                              | 0.921                                           | 0.974                   | 0.410                                | 1.575          |                              |
| hsa-miR-331-3p                                                                               | 0.877                                           | 0.981                   | 0.704                                | 1.577          |                              |
| hsa-miR-93-3p                                                                                | 0.873                                           | 1.029                   | 0.425                                | 1.590          |                              |
| hsa-miR-26a-5p                                                                               | 0.882                                           | 0.981                   | 0.583                                | 1.662          |                              |
| hsa-miR-106b-5p                                                                              | 0.880                                           | 1.016                   | 0.724                                | 1.695          |                              |
| hsa-miR-7-1-3p                                                                               | 0.875                                           | 0.994                   | 0.874                                | 1.707          |                              |
| hsa-miR-130b-3p                                                                              | 0.878                                           | 0.999                   | 0.972                                | 1.734          |                              |
| hsa-miR-30c-5p                                                                               | 0.898                                           | 0.972                   | 0.366                                | 1.755          |                              |
| hsa-miR-24-3p                                                                                | 0.888                                           | 0.938                   | 0.320                                | 1.796          |                              |
| hsa-miR-218-5p                                                                               | 0.887                                           | 0.962                   | 0.244                                | 1.835          |                              |
| hsa-miR-15b-3p                                                                               | 0.873                                           | 1.008                   | 0.613                                | 2.398          |                              |

<sup>a</sup> MiRBase version 21 (www.mirbase.org, accessed July 25 2014).

<sup>b</sup> Spearman's rank correlation coefficient.

<sup>c</sup> Correlation to OS duration tested using Cox proportional hazards model.

<sup>d</sup> Stability score calculated according to the method described in Vandesompele et al. [1]

Abbreviations: OS, overall survival; C<sub>q</sub>, quantification cycle; HR/C<sub>q</sub>, hazard ratio per 40-C<sub>q</sub> increase.

26

27

28

29



**Supplementary Table S9.** Reference miRNAs – pancreatic cancer (using all measurements)

| MiRNA name <sup>a</sup> | Correlation to global mean C <sub>q</sub> |                   | Correlation to OS <sup>c</sup> |         | Stability <sup>d</sup> |
|-------------------------|-------------------------------------------|-------------------|--------------------------------|---------|------------------------|
|                         | r <sub>s</sub> <sup>b</sup>               | HR/C <sub>q</sub> | P                              | M score |                        |
| Global mean             | –                                         | 1.210             | 0.145                          | –       |                        |
| hsa-miR-103a-3p         | 0.906                                     | 1.103             | 0.064                          | 0.681   |                        |
| hsa-miR-374b-5p         | 0.892                                     | 1.129             | 0.033                          | 0.715   |                        |
| hsa-let-7g-5p           | 0.877                                     | 1.094             | 0.034                          | 0.761   |                        |
| hsa-miR-361-5p          | 0.885                                     | 1.113             | 0.097                          | 0.781   |                        |
| hsa-miR-374a-5p         | 0.886                                     | 1.097             | 0.074                          | 0.792   |                        |
| hsa-miR-28-5p           | 0.868                                     | 1.112             | 0.106                          | 0.796   |                        |
| hsa-miR-26b-5p          | 0.886                                     | 1.071             | 0.076                          | 0.816   |                        |
| hsa-miR-301a-3p         | 0.879                                     | 1.059             | 0.198                          | 0.817   |                        |
| hsa-miR-27a-3p          | 0.882                                     | 1.227             | 0.001                          | 0.825   |                        |
| hsa-miR-340-5p          | 0.868                                     | 1.167             | 0.022                          | 0.826   |                        |
| hsa-miR-24-3p           | 0.894                                     | 1.191             | 0.002                          | 0.829   |                        |
| hsa-miR-26a-5p          | 0.888                                     | 1.094             | 0.023                          | 0.832   |                        |
| hsa-miR-29a-3p          | 0.898                                     | 1.141             | 0.033                          | 0.833   |                        |
| hsa-miR-152-3p          | 0.878                                     | 1.113             | 0.073                          | 0.850   |                        |
| hsa-miR-195-5p          | 0.865                                     | 1.084             | 0.035                          | 0.858   |                        |
| hsa-miR-130a-3p         | 0.879                                     | 1.064             | 0.072                          | 0.916   |                        |
| hsa-miR-126-5p          | 0.866                                     | 1.083             | 0.156                          | 0.938   |                        |
| hsa-miR-34a-3p          | 0.863                                     | 1.089             | 0.056                          | 0.958   |                        |
| hsa-miR-199a-3p         | 0.880                                     | 1.085             | 0.005                          | 0.967   |                        |
| hsa-miR-22-5p           | 0.860                                     | 1.062             | 0.072                          | 1.011   |                        |

<sup>a</sup> MiRBase version 21 (www.mirbase.org, accessed July 25 2014).

<sup>b</sup> Spearman's rank correlation coefficient.

<sup>c</sup> Correlation to OS duration tested using Cox proportional hazards model.

<sup>d</sup> Stability score calculated according to the method described in Vandesompele et al. [1]

Abbreviations: OS, overall survival; C<sub>q</sub>, quantification cycle; HR/C<sub>q</sub>, hazard ratio per 40-C<sub>q</sub> increase.

31

32

33

**Supplementary Table S10.** Studies identifying miRNA reference genes using unbiased approaches

| Author               | Year | Sample type                               | Storage | Samples | MiRNA reference genes                                                                                                                                                                                                                                                                                                            |
|----------------------|------|-------------------------------------------|---------|---------|----------------------------------------------------------------------------------------------------------------------------------------------------------------------------------------------------------------------------------------------------------------------------------------------------------------------------------|
| Liang [4]            | 2007 | Normal tissue from 40 different locations | Frozen  | 40      | <b>miR-103</b> , <b>miR-106b</b> , <b>miR-140</b> , miR-152N, miR-15b, miR-16, <b>miR-29a</b> , miR-29aN, miR-29bN, miR-30e, miR-324-3p, miR-423, miR-92, miR-92N, miR-93                                                                                                                                                        |
| Peltier [5]          | 2008 | Normal tissue from 13 organs              | Frozen  | 13      | miR-191, miR-93, miR-106a, miR-25, miR-17-5p, miR-16, let-7a, <b>miR-103</b> , <b>miR-24</b> , miR-99a                                                                                                                                                                                                                           |
|                      |      | Normal Tumor-adjacent tissue from lung    | Frozen  | 5       | miR-191, let-7a, miR-17-5p, miR-25, miR-24, miR-320, miR-23a, miR-106a, miR-93, <b>miR-103</b> , miR-16, miR-30d                                                                                                                                                                                                                 |
|                      |      | Lung cancer                               | Frozen  | 5       | <b>miR-103</b> , miR-25, miR-191, miR-24, let-7a, miR-17-5p, miR-23a, miR-106a, miR-16, miR-320, miR-93, miR-30d                                                                                                                                                                                                                 |
| Mestdagh [6]         | 2009 | Neuroblastoma                             | Frozen  | 61      | miR-125a, miR-191, <b>miR-425</b>                                                                                                                                                                                                                                                                                                |
|                      |      | Bone marrow                               | Frozen  | 11      | <b>miR-30c</b> , <b>miR-140</b> , miR-328                                                                                                                                                                                                                                                                                        |
|                      |      | Normal tissue from 8 organs               | Frozen  | 8       | <b>let-7f</b> , <b>miR-339</b> , miR-572, miR-632                                                                                                                                                                                                                                                                                |
|                      |      | T-cell acute lymphoblastic leukemia       | Frozen  | 49      | <b>miR-331</b> , <b>miR-361</b> , miR-423                                                                                                                                                                                                                                                                                        |
|                      |      | EVI-1 leukemia                            | Frozen  | 18      | miR-16, <b>miR-140</b> , miR-191                                                                                                                                                                                                                                                                                                 |
| Chang [7]            | 2010 | Colorectal cancer and normal              | Frozen  | 20      | let-7a, miR-16, <b>miR-26a</b> , miR-345, <b>miR-425</b> , miR-454                                                                                                                                                                                                                                                               |
| Wotschofsky [8]      | 2011 | Kidney cancer and normal kidney           | Frozen  | 59      | <b>miR-28</b> , <b>miR-103</b> , miR-106a, miR-151                                                                                                                                                                                                                                                                               |
| Viprey [9]           | 2012 | Peripheral whole blood and bone marrow    | Frozen  | 98      | <b>miR-24</b> , <b>miR-26a</b> , <b>miR-28-5p</b>                                                                                                                                                                                                                                                                                |
| <i>Current study</i> | 2014 | Colorectal cancer                         | FFPE    | 197     | <b>miR-103a-3p</b> , miR-152-3p, miR-132-3p, miR-27a-3p, <b>miR-140-5p</b> , miR-30b-5p, <b>miR-339-5p</b> , <b>miR-331-3p</b> , miR-374a-5p, miR-652-3p, miR-335-5p, miR-185-5p, <b>miR-30c-5p</b> , miR-151a-5p, <b>miR-106b-5p</b> , miR-199a-3p, <b>miR-28-5p</b> , <b>miR-425-5p</b> , <b>miR-26a-5p</b> , <b>miR-24-3p</b> |
|                      |      | Pancreatic cancer                         | FFPE    | 188     | <b>miR-103a-3p</b> , miR-374b-5p, <b>miR-361-5p</b> , miR-374a-5p, let-7g-5p, <b>miR-28-5p</b> , <b>miR-29a-3p</b> , miR-301a-3p, miR-340-5p, miR-27a-3p, <b>miR-106b-5p</b> , miR-152-3p, miR-26b-5p, miR-660-5p, <b>miR-26a-5p</b> , <b>miR-24-3p</b> , miR-130a-3p, miR-23b-3p, <b>let-7f-5p</b> , miR-199a-3p,               |

MiRNAs in bold in the lists from the previous studies are miRNAs that were also found in the current study and miRNAs in bold from the current study are miRNAs that have been identified previously. MiRNA reference gene lists are ordered by decreasing stability in studies where stability data were available.

Abbreviations: FFPE, formalin-fixed paraffin-embedded tissue.

34 **SUPPLEMENTARY FIGURE LEGENDS**

35 **Supplementary Figure S1.** Overview of sample cohorts and associated analyses.

36

37 **Supplementary Figure S2.** Ratio between mean expression of the identified top four reference miRNAs and  
38 global mean miRNA expression as a function of tumor cell percentage in colorectal cancer samples.

39 Differences between groups were tested with Kruskal-Wallis rank-sum test.

40

41 **Supplementary Figure S3.** Correlation between the mean ( $C_q$ ) expression of the identified top four  
42 reference miRNAs and the global mean miRNA expression in pancreas samples.

43 Samples were from pancreatic cancer (A), normal pancreas (B), or chronic pancreatitis (C). Correlations for  
44 paired samples were tested by means of Pearson product moment coefficient.

45 **Supplementary Figure S4.** Hierarchical clustering dendrogram of miRNA expression in methodological  
46 samples using 1-Pearson correlation and complete linkage.

47 Samples are named as: Project ID – Tumor number – cluster number. Project ID and tumor number are  
48 explained in Supplementary Table S1.

49

50 **Supplementary Figure S5.** Hierarchical clustering dendrogram of miRNA expression in methodological  
51 samples using Euclidean distance and complete linkage on raw expression values.

52 Samples are named as: Project ID – Tumor number – cluster number. Project ID and tumor number are  
53 explained in Supplementary Table S1.

54

55 **Supplementary Figure S6.** Hierarchical clustering dendrogram of miRNA expression in methodological  
56 samples using Euclidean distance and complete linkage on global mean normalized expression values.

57 Samples are named as: Project ID – Tumor number – cluster number. Project ID and tumor number are  
58 explained in Supplementary Table S1.

59

60 **Supplementary Figure S7.** Hierarchical clustering dendrogram of miRNA expression in methodological  
61 samples using Euclidean distance and complete linkage on expression values normalized by the mean of the  
62 optimal number of reference miRNAs (N=4).

63 Samples are named as: Project ID – Tumor number – cluster number. Project ID and tumor number are  
64 explained in Supplementary Table S1.

65

66 **Supplementary Figure S8.** Hierarchical clustering dendrogram of miRNA expression in methodological  
67 samples using Euclidean distance and complete linkage on expression values normalized by the mean of the  
68 two best reference miRNAs (miR-103a-3p and miR-152-3p).

69 Samples are named as: Project ID – Tumor number – cluster number. Project ID and tumor number are  
70 explained in Supplementary Table S1.

71

72 **Supplementary Figure S9.** Sample-wise comparison of high-quality mean miRNA expression in  $C_q$   
73 (measurements with  $C_q > 32$  and miRNAs with  $> 5\%$  undetermined removed) and low-quality mean miRNA  
74 expression (no measurements removed).

**Sample cohorts**

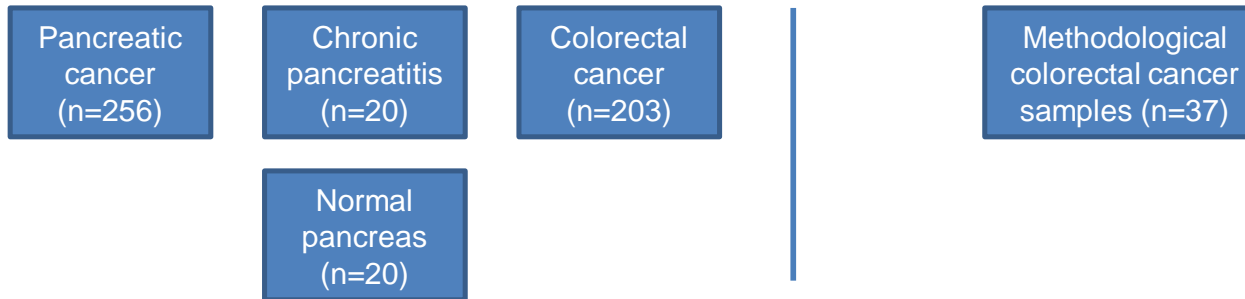

**Samples were used for the following analyses**

- 
- The analyses performed on the samples are listed in two columns, separated by a vertical line. The left column lists three analyses: Reference miRNA identification, Sample age effect on miRNA expression, and Reference miRNA correlation with global mean in non-cancer samples. The right column lists five analyses: Technical replicates (same purification), Biological replicates (same tissue block), FFPE versus frozen (paired samples from the same resected tumor), Effect of normalization on variability, and Hierarchical clustering.
- Reference miRNA identification
  - Sample age effect on miRNA expression
  - Reference miRNA correlation with global mean in non-cancer samples
  - Technical replicates (same purification)
  - Biological replicates (same tissue block)
  - FFPE versus frozen (paired samples from the same resected tumor)
  - Effect of normalization on variability
  - Hierarchical clustering

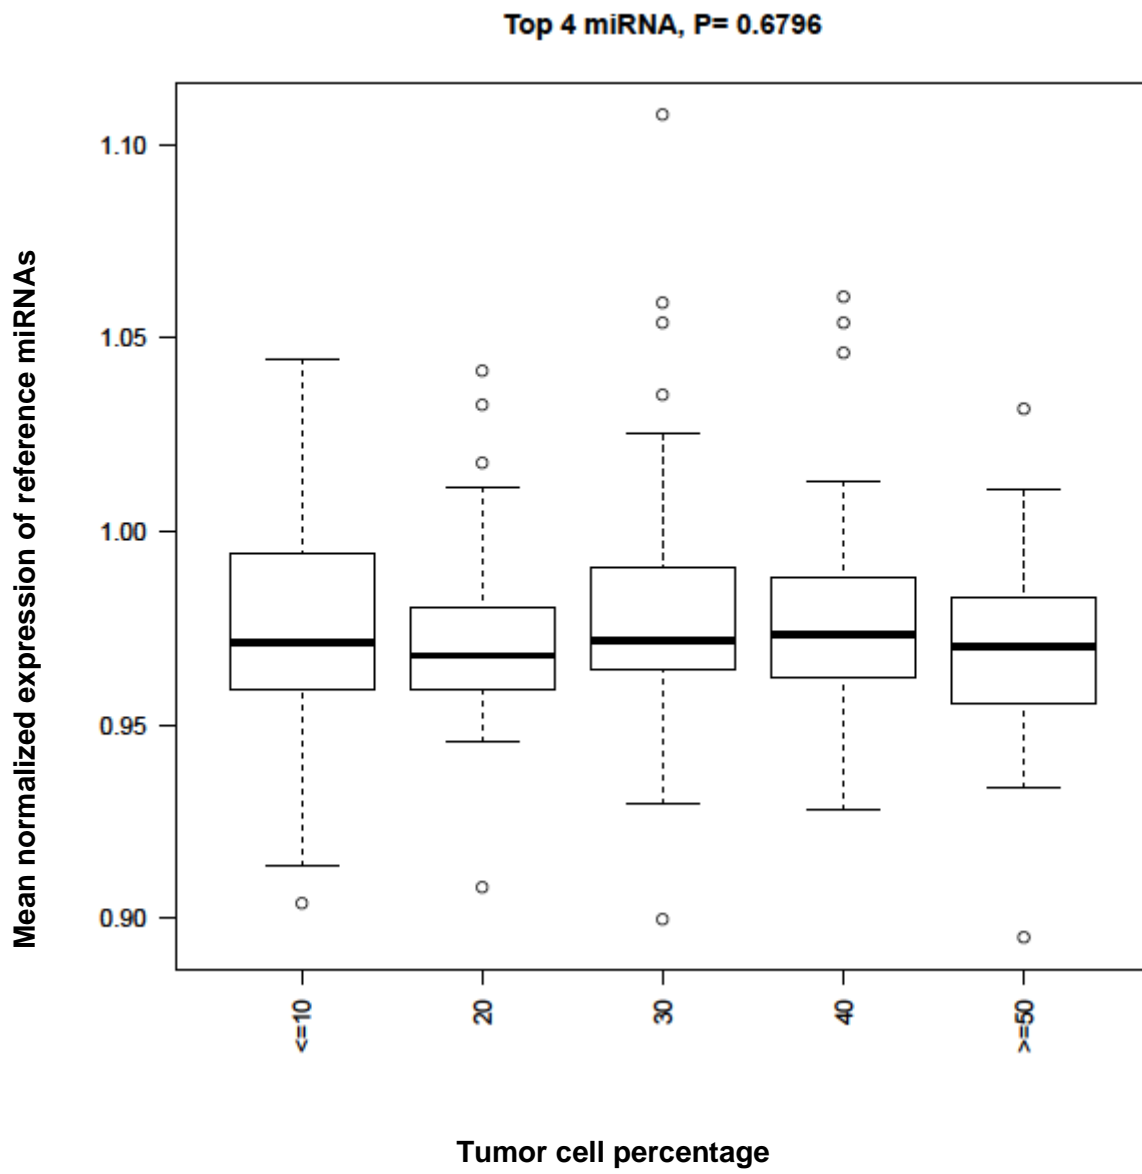

82 **Supplementary Figure S3**

83

84

**A**

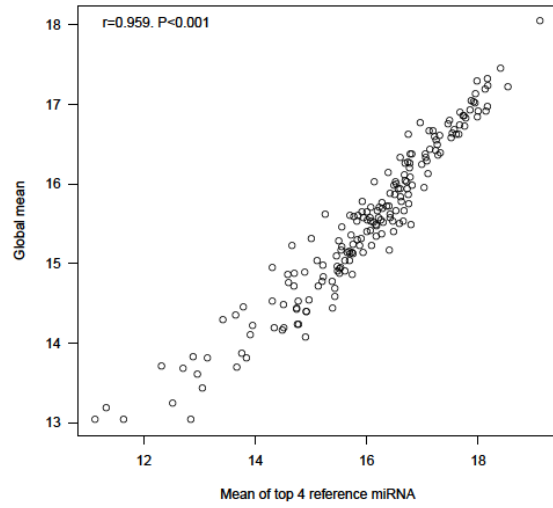

**B**

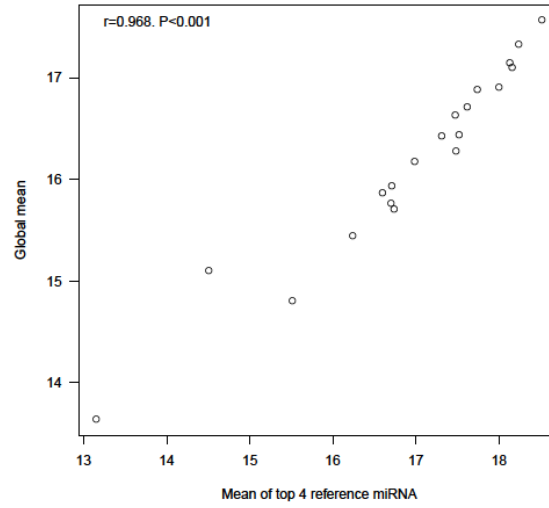

**C**

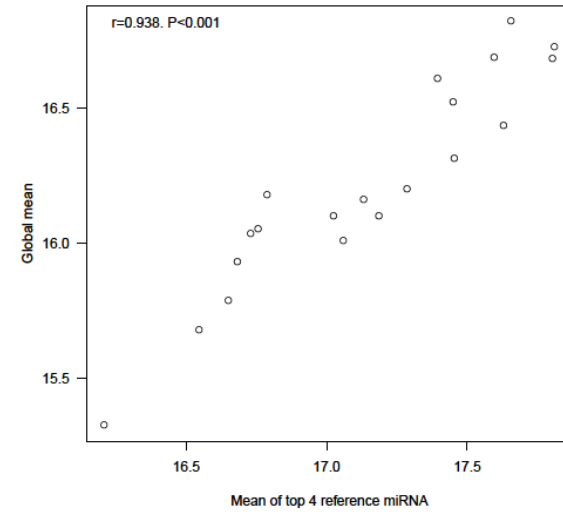

85

86

87

88 **Supplementary Figure S4**

**Cluster Dendrogram**

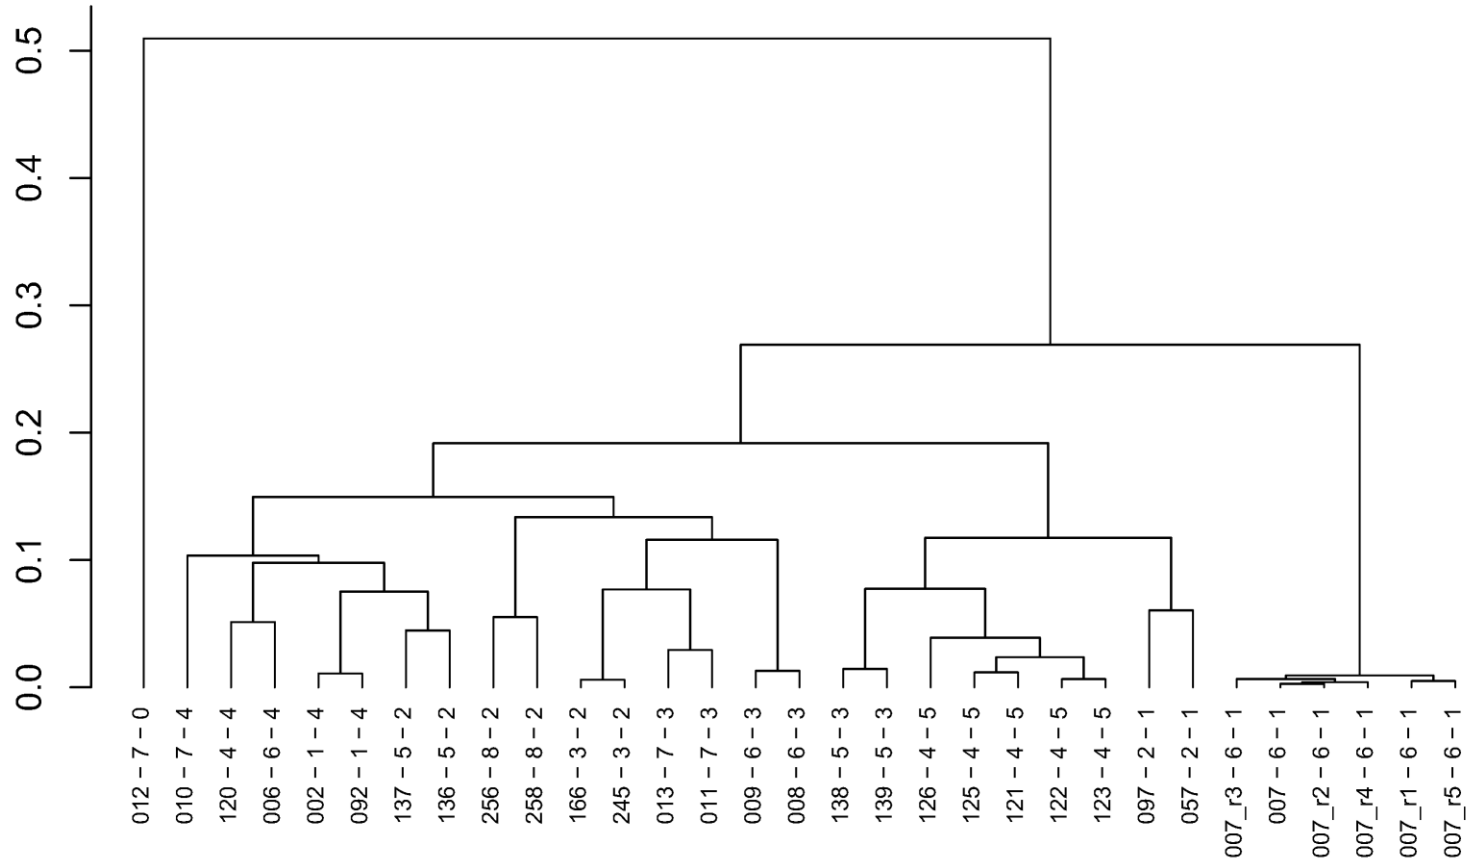

89

90



91

92 **Supplementary Figure S5**

### Cluster Dendrogram

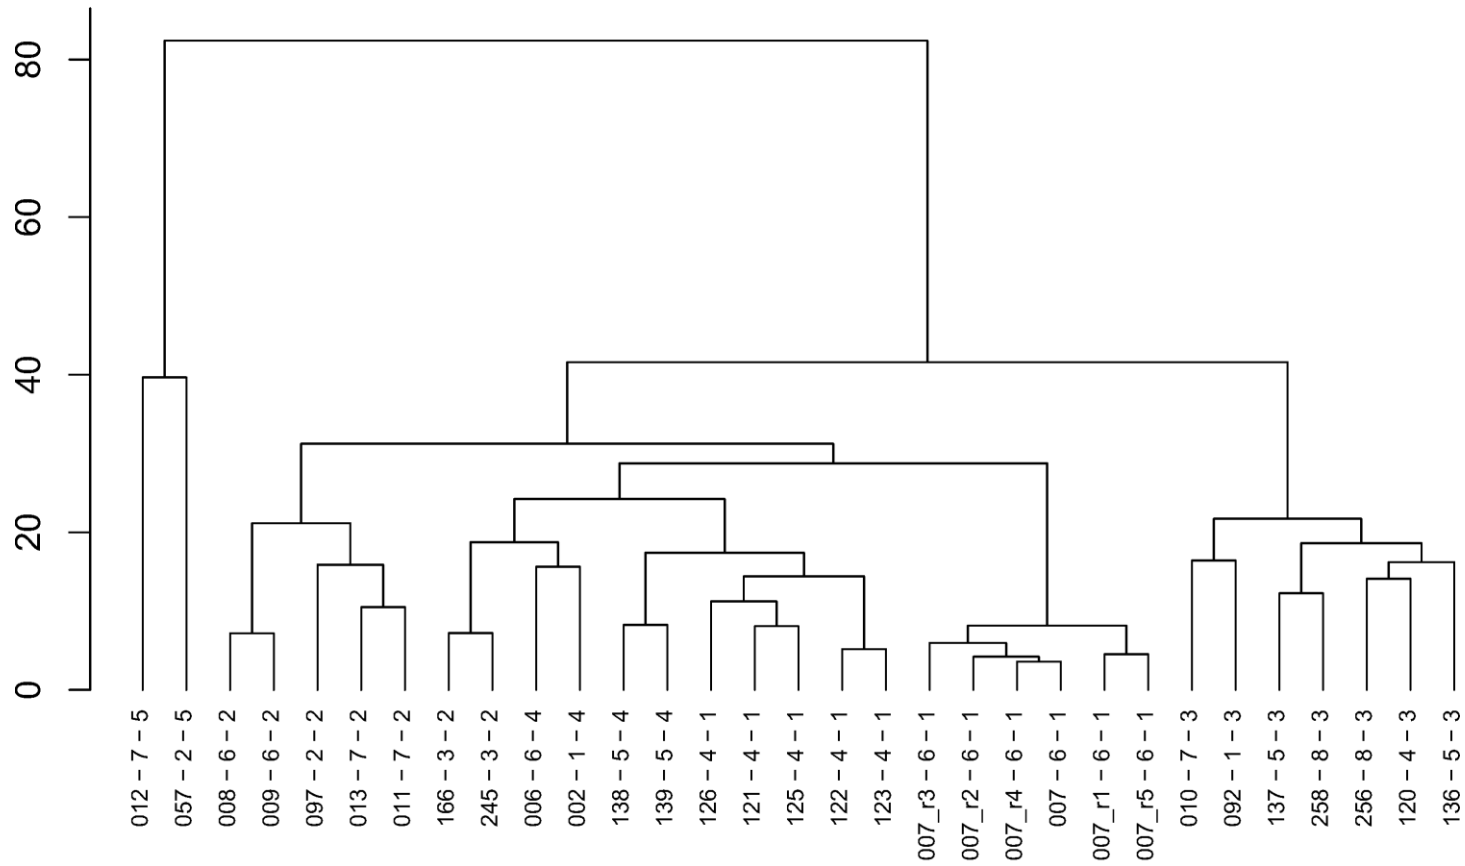

93

94

95

96 **Supplementary Figure S6**

### Cluster Dendrogram

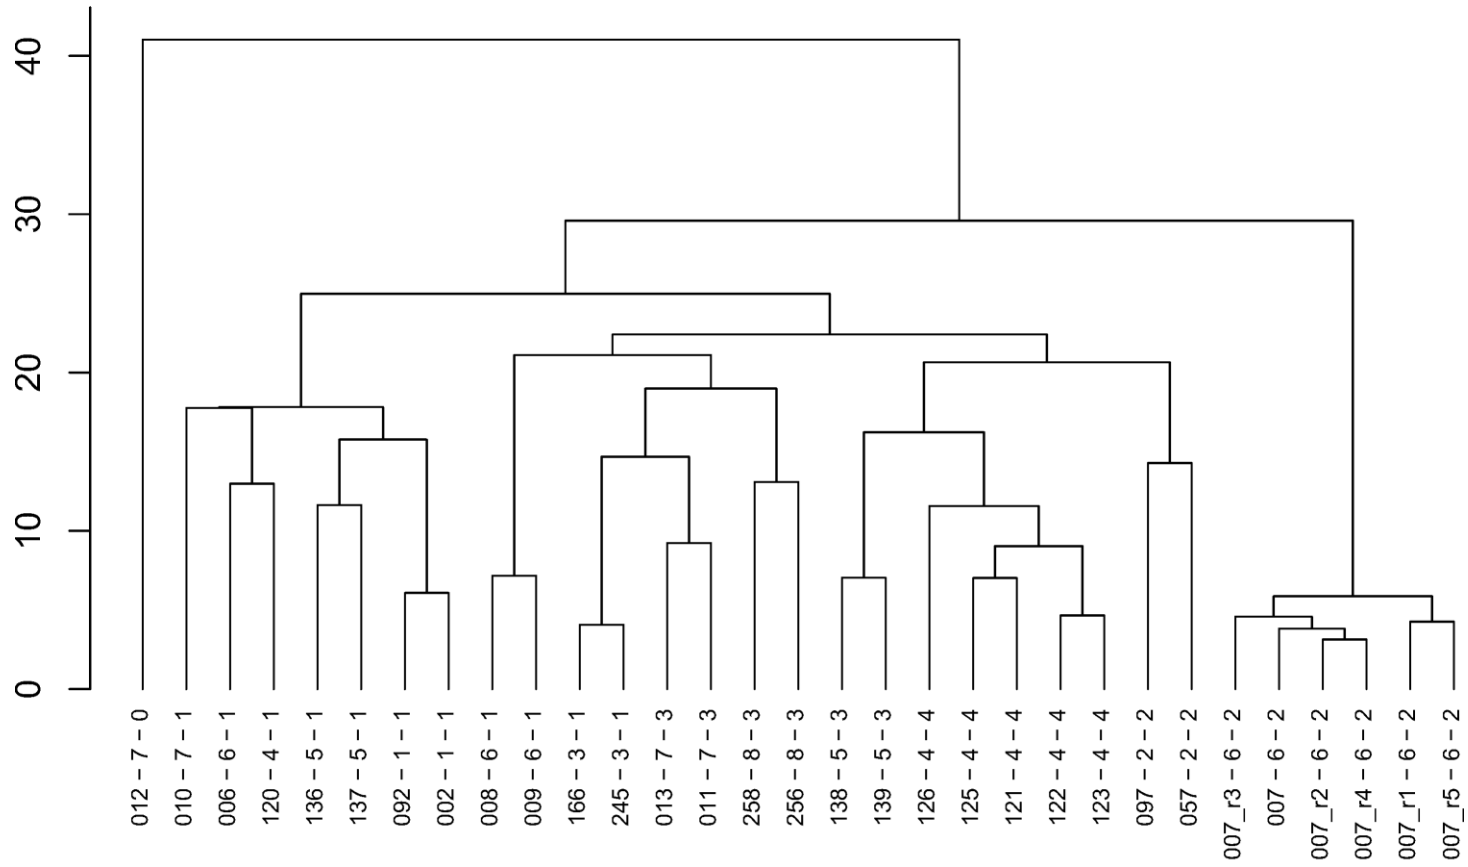

97

98

### Cluster Dendrogram

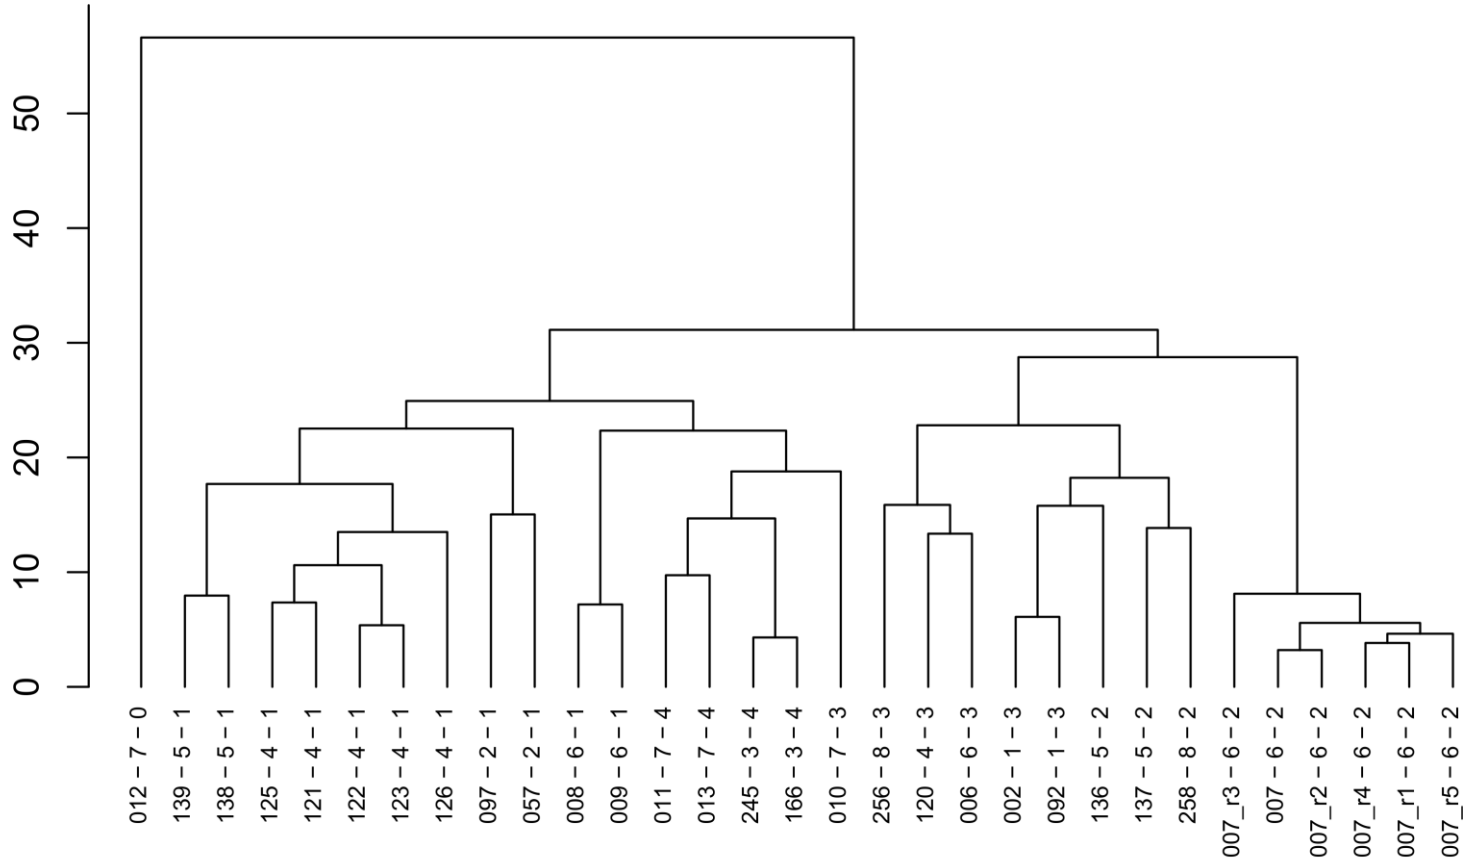

103

104 **Supplementary Figure S8**

### Cluster Dendrogram

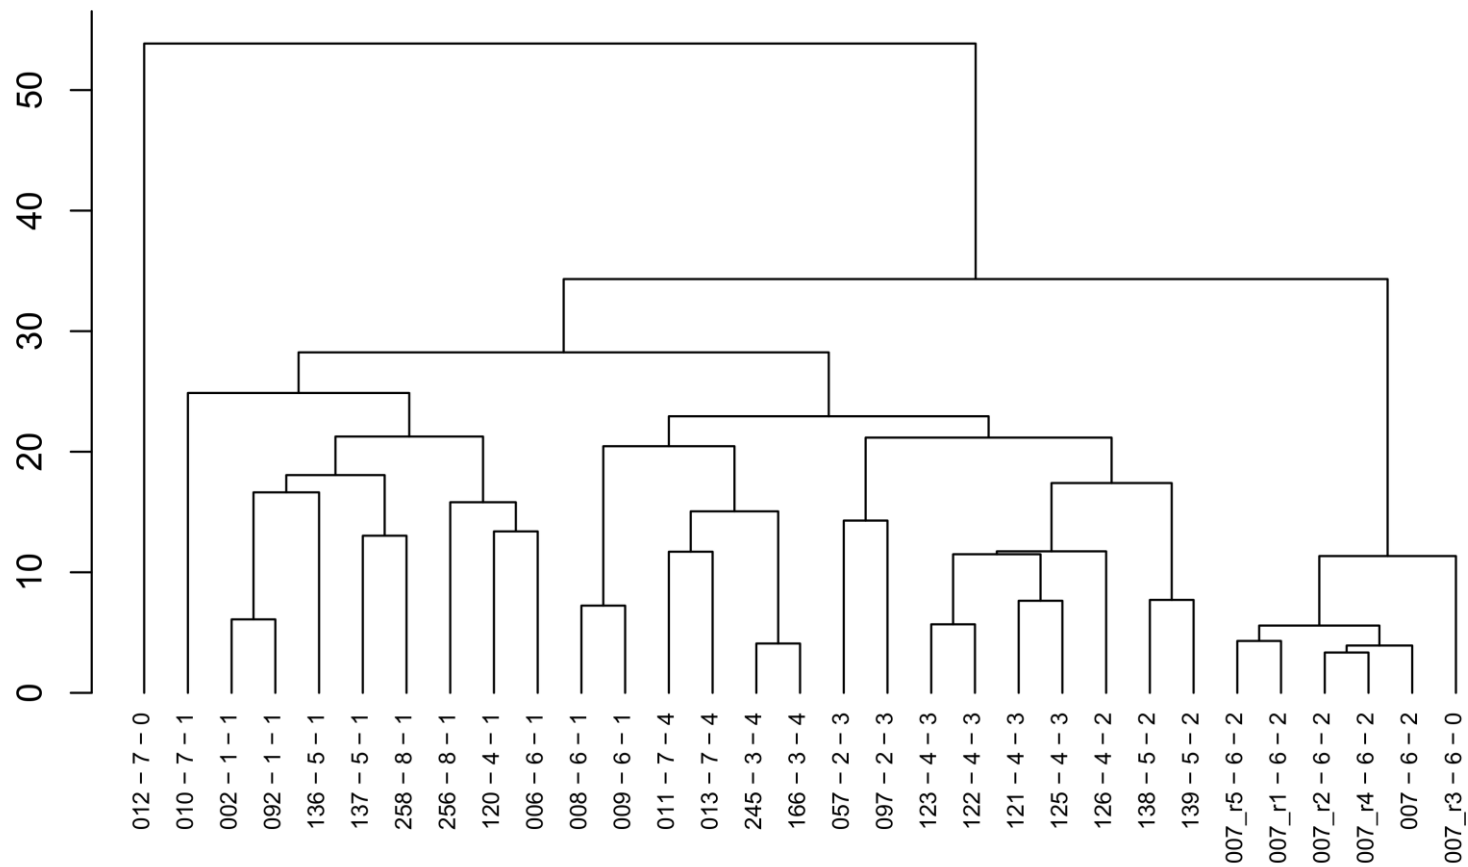

105

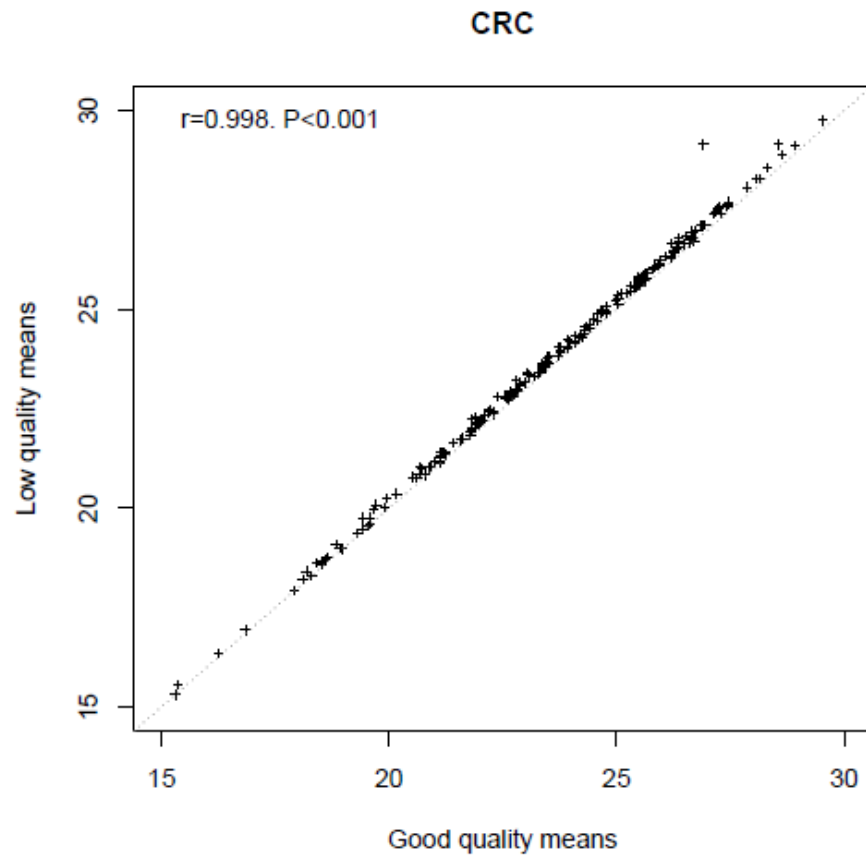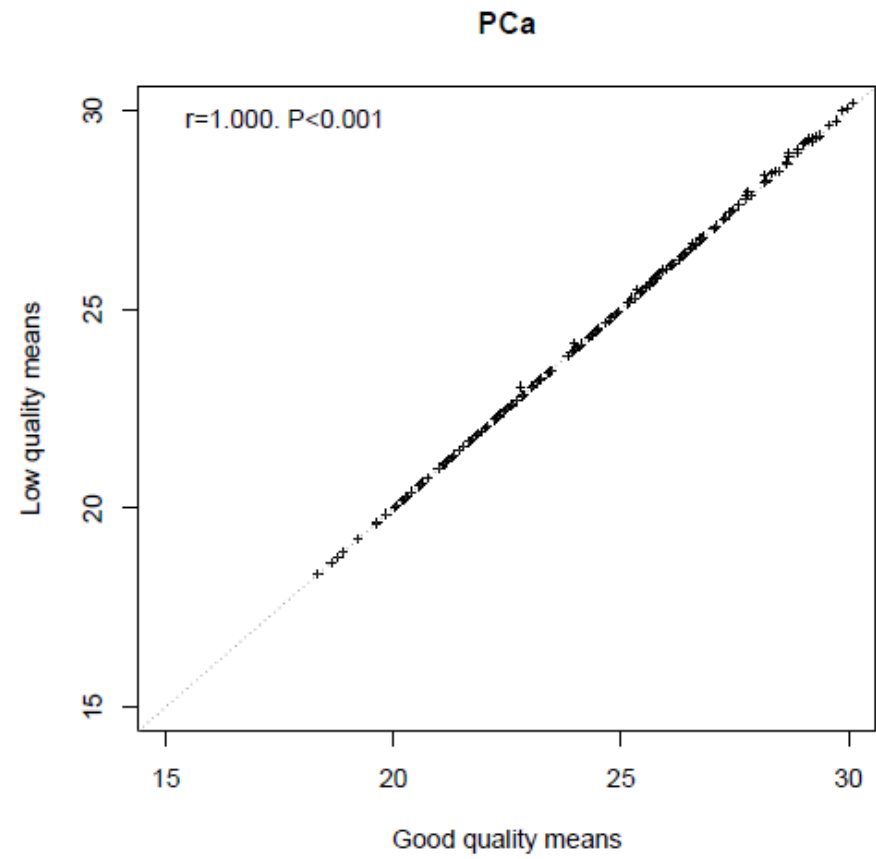

110 **REFERENCES**

- 111 1. Vandesompele J, De Preter K, Pattyn F, Poppe B, Van Roy N, De Paepe A et al. Accurate normalization  
112 of real-time quantitative RT-PCR data by geometric averaging of multiple internal control genes. *Genome*  
113 *Biol.* 2002;3(7):RESEARCH0034.
- 114 2. Boisen MK, Dehlendorff C, Linnemann D, Nielsen BS, Larsen JS, Østerlind K et al. Tissue MicroRNAs  
115 as Predictors of Outcome in Patients with Metastatic Colorectal Cancer Treated with First Line Capecitabine  
116 and Oxaliplatin with or without Bevacizumab. *PLoS One.* 2014;9(10):e109430.
- 117 3. Schultz NA, Andersen KK, Roslind A, Willenbrock H, Wojdemann M, Johansen JS. Prognostic  
118 microRNAs in cancer tissue from patients operated for pancreatic cancer--five microRNAs in a prognostic  
119 index. *World J Surg.* 2012;36(11):2699-707.
- 120 4. Liang Y, Ridzon D, Wong L, Chen C. Characterization of microRNA expression profiles in normal human  
121 tissues. *BMC Genomics.* 2007;8:166.
- 122 5. Peltier HJ, Latham GJ. Normalization of microRNA expression levels in quantitative RT-PCR assays:  
123 identification of suitable reference RNA targets in normal and cancerous human solid tissues. *RNA.*  
124 2008;14(5):844-52.
- 125 6. Mestdagh P, Van Vlierberghe P, De Weer A, Muth D, Westermann F, Speleman F et al. A novel and  
126 universal method for microRNA RT-qPCR data normalization. *Genome Biol.* 2009;10(6):R64.
- 127 7. Chang KH, Mestdagh P, Vandesompele J, Kerin MJ, Miller N. MicroRNA expression profiling to identify  
128 and validate reference genes for relative quantification in colorectal cancer. *BMC Cancer.* 2010;10:173.
- 129 8. Wotschofsky Z, Meyer HA, Jung M, Fendler A, Wagner I, Stephan C et al. Reference genes for the  
130 relative quantification of microRNAs in renal cell carcinomas and their metastases. *Anal Biochem.*  
131 2011;417(2):233-41.
- 132 9. Viprey VF, Corrias MV, Burchill SA. Identification of reference microRNAs and suitability of archived  
133 hemopoietic samples for robust microRNA expression profiling. *Anal Biochem.* 2012;421(2):566-72.

134
